# Supplementary material
Source: PubMed Central journal article supplement (PMC4318654)
Supplement: NIHMS575262-supplement-Appendix.pdf [file NIHMS575262-supplement-Appendix.pdf]

## On-line Appendix

### **Early Childhood Education Meta-analytic data base**

The meta-analytic database used for Figure 2 is the product of the National Forum on Early Childhood Policy and Programs (<http://developingchild.harvard.edu/initiatives/forum/>) and was compiled under the direction of the authors, Holly Schindler and Hirokazu Yoshikawa . The Forum is housed at the Center for the Developing Child at Harvard University, which is directed by Jack Shonkoff. A multi-step data collection and evaluation process was used to determine what studies would be included in this database. The first step was to conduct a comprehensive search of the literature from 1960 to 2007, when the coding project began. The Forum was able to take advantage of another meta-analytic database compiled previously by Abt Associates, Inc. and the National Institute for Early Education Research (NIEER), which included early childhood intervention studies from 1960-2003 (Camilli et al., 2010; Jacob, Creps & Boulay, 2004; Layzer, Goodson, Bernstein & Price, 2001). This yielded 624 previously coded studies.

To search for additional studies, the Forum next conducted keyword searches in ERIC, PsycINFO, EconLit, and Dissertation Abstracts databases, resulting in 9,617 documents, as any given program may produce a series of such documents. It then manually searched the websites of policy institutes (e.g., RAND, Mathematica, NIEER) and state and federal departments (e.g., U.S. Department of Health and Human Services), as well as references mentioned in collected studies and other key early childhood education reviews. This search produced another 692 documents. In sum, 10,309 documents for potential inclusion in the early childhood education portion of the database were identified.

The vast majority (91%) of the 10,309 documents were excluded because they violated at least one of the inclusion criteria. Most of the excluded documents were not actual research studies but rather commentaries or reviews. Others were eliminated because of methodological shortcomings, because they were not clear about the selection process for participants in the study, or because their interventions took place outside of the United States. The resulting database includes studies of programs or interventions for children between birth and age 5.

The Forum next developed criteria for the inclusion of studies into its meta-analytic database. In addition to the requirement that they examine an early childhood education intervention or program reported on from 1960 to 2007, studies had to have a treatment and control/comparison group, rather than simply assessing the growth of one group of children over time. Each of the groups in the study had to have included at least 10 participants and incurred less than 50% attrition. Studies were excluded if they were testing a pharmacological agent, assessed children with medical disorders or learning disabilities, or tested the effectiveness of medical procedures or health-related products.

Figure 2 focuses exclusively on treatment effects from early childhood education programs, defined as structured, center-based early childhood education classes, day care with some educational component, or center-based child care. These include full pre-school programs such as Head Start and other interventions conducted by researchers. Programs included were required to have provided services to children, their families, or staff at the program sites, and assessed program impacts on children's cognitive and achievement outcomes.

About one-third of the ECE studies used random assignment with the remainder following quasi-experimental designs such as change models, individual or family fixed effects models, regression discontinuity, difference in difference, propensity score matching, interrupted

time series, instrumental variables and some other types of matching. Studies that used quasi-experimental designs must have had pre- and post-test information on the outcome or established baseline equivalence of groups on demographic characteristics determined by a joint test.

A team of nine graduate research assistants at three universities (Harvard, UC Irvine, and University of Wisconsin-Madison) were trained as coders during a 3- to 6-month process that included instruction in evaluation methods, using the coding protocol, and computing effect sizes. Trainees were paired with experienced coders in multiple rounds of practice coding. Before coding independently, research assistants also passed a reliability test comprised of randomly selected codes from a randomly selected study. In order to pass the reliability test, research assistants had to calculate 100% of the effect sizes correctly and achieve 80% agreement with a master coder for the remaining codes. In instances when research assistants were just under the threshold for effect sizes, but were reliable on the remaining codes, they underwent additional effect size training before coding independently and were subject to periodic checks during their transition. Questions about coding were resolved in weekly research team conference calls usually involving all four principal investigators, and decisions were kept in an annotated codebook so that decisions about ambiguities could be recalled when coding subsequent studies. In a few instances, codes were added and previously coded studies were adjusted accordingly to account for the new additions.

Each study's outcome measures were coded into standardized mean difference effect sizes, which were computed using the Comprehensive Meta-Analysis computer software program (Borenstein, Hedges, Higgins, & Rothstein, 2005). We used the Hedges' *g*-based definition of effect sizes, which adjusts standardized mean differences (Cohen's *d*) to account for bias arising from small sample sizes.

Data for Figure 2 come from the 84 programs that assessed cognitive and/or achievement outcomes around the end of their treatments and used no-program control groups. So, for example, early childhood education programs that tested a version of a classroom-based program that included home visitation vs. the classroom program that did not include home visitation are not included in the figure.

Operationally, we choose effects sizes closest to the end of treatments but defined the end of treatment interval to include effect sizes measured as late as one year following the completion of the program and as early as 75% of the length of the program. All available effect sizes for cognitive or achievement measures at the point closest to the end of treatment are included in the analysis.

The effect sizes shown in Figure 2 and in the Appendix Table are simple means of all effect size estimates for cognitive and achievement outcomes for each given program. Bubbles areas are proportional to the inverse of squared standard errors of the average estimates, which is calculated by a Bayesian shrinkage model to take sampling variation of the within-study estimates into account. The inverse of standard error squared is also used to weight the trend line shown in Figure 2. To avoid sensitivity to extremely large variance weights, weight values are truncated from above at 100, which corresponds to standard errors on treatment effect estimates of .10 standard deviations.

The effect sizes shown in Figure 2 are estimates and therefore subject to sampling variation. Estimating their variability with a random effects model or with a Bayesian shrinkage estimator reduces the standard deviation across all study-average effects sizes by nearly 50%.

Appendix Table 1. Data Used in Figure 2

| <b>Program name</b>                                                                                      | <b>Starting year</b> | <b>Average effect size at end-of-program</b> | <b>1 / Study level standard-error squared</b> | <b>Head Start=1</b> |
|----------------------------------------------------------------------------------------------------------|----------------------|----------------------------------------------|-----------------------------------------------|---------------------|
| Evaluation of the effect of Head Start program on cognitive growth of disadvantaged children             | 1963                 | 0.54                                         | 15.13                                         | 1                   |
| National Head Start and Summer Head Start program, 1965-1968                                             | 1965                 | 0.10                                         | 53.46                                         | 1                   |
| Summer Head Start in Kearney, NE                                                                         | 1965                 | 0.08                                         | 6.08                                          | 1                   |
| Summer Head Start in San Jose, CA                                                                        | 1965                 | 0.42                                         | 14.34                                         | 1                   |
| Summer Head Start in Cambridge, MA                                                                       | 1965                 | 0.14                                         | 11.03                                         | 1                   |
| Head Start in Miami, FL                                                                                  | 1965                 | 0.79                                         | 9.63                                          | 1                   |
| Summer Head Start in Duluth, MN                                                                          | 1965                 | 0.38                                         | 14.93                                         | 1                   |
| Impact of 1965 Summer Head Start on children's concept attainment by Allerhand                           | 1965                 | 0.46                                         | 13.28                                         | 1                   |
| Summer Head Start in Lincoln, NE, matched pairs                                                          | 1965                 | 0.03                                         | 71.07                                         | 1                   |
| Summer Head Start in Lincoln, NE, unmatched pairs                                                        | 1965                 | -0.06                                        | 3.04                                          | 1                   |
| Bicultural preschool programmed Head Start                                                               | 1966                 | 0.74                                         | 6.29                                          | 1                   |
| Summer Head Start in Washington, DC                                                                      | 1966                 | -0.07                                        | 35.40                                         | 1                   |
| Head Start effects on children's behavior and cognitive functioning one year later by Nummedal and Stern | 1967                 | -0.13                                        | 13.50                                         | 1                   |
| Experiments in Head Start and early education: Direct instruction in Head Start vs. No preschool         | 1968                 | 0.47                                         | 12.14                                         | 1                   |
| Experiments in Head Start and early education: Enrichment in Head Start vs. No preschool                 | 1968                 | 0.40                                         | 13.25                                         | 1                   |
| Head Start in rural areas, MN                                                                            | 1968                 | 0.70                                         | 15.93                                         | 1                   |
| Comparison of children enrolled in Head start or no preschool in two cities                              | 1969                 | 0.33                                         | 93.45                                         | 1                   |
| Planned Variation in Head Start, Head Start with curricula vs. no Head Start                             | 1969                 | 0.32                                         | 10.13                                         | 1                   |
| Planned Variation in Head Start, standard Head Start vs. no Head Start                                   | 1969                 | 0.27                                         | 23.96                                         | 1                   |
| Head Start in New Haven, CT                                                                              | 1971                 | 0.55                                         | 12.91                                         | 1                   |
| Head Start in New Haven, CT                                                                              | 1971                 | 0.39                                         | 25.94                                         | 1                   |
| Head Start Bilingual Bicultural Development Project, bilingual Head Start vs. Stay at home               | 1979                 | 0.29                                         | 16.18                                         | 1                   |
| Head Start Bilingual Bicultural Development Project, standard Head Start vs. Stay at home                | 1979                 | 0.33                                         | 6.99                                          | 1                   |
| Head Start in New Haven, CT                                                                              | 1979                 | 0.55                                         | 17.33                                         | 1                   |
| Head Start in Guam                                                                                       | 1985                 | 0.02                                         | 19.95                                         | 1                   |
| Early Head Start Research and Evaluation Project                                                         | 1996                 | 0.13                                         | 100.00                                        | 1                   |
| ECLS-K Head Start Study, white                                                                           | 1997                 | -0.06                                        | 100.00                                        | 1                   |
| ECLS-K Head Start Study, African-American                                                                | 1997                 | 0.05                                         | 100.00                                        | 1                   |
| ECLS-K Head Start Study, Hispanic                                                                        | 1997                 | -0.04                                        | 39.42                                         | 1                   |
| Southeastern Head Start program of high quality                                                          | 1998                 | 0.35                                         | 24.43                                         | 1                   |
| National Head Start Impact Study First Year, 3-year-old cohort                                           | 2002                 | 0.26                                         | 47.99                                         | 1                   |
| National Head Start Impact Study First Year, 4-year-old cohort                                           | 2002                 | 0.25                                         | 100.00                                        | 1                   |
| NYC Early Head Start, 12 months of younger                                                               | 2002                 | -0.34                                        | 1.30                                          | 1                   |

|                                                                                                                |      |       |        |   |
|----------------------------------------------------------------------------------------------------------------|------|-------|--------|---|
| NYC Early Head Start, older than 12 months                                                                     | 2002 | 0.23  | 0.61   | 1 |
| Early Training Project                                                                                         | 1962 | 1.04  | 8.47   | 0 |
| Preschool intervention with disadvantaged children in early 1960s Cambridge, Pre-k & responsive environments   | 1962 | -0.01 | 11.42  | 0 |
| Preschool intervention with disadvantaged children in early 1960s Cambridge, Pre-k                             | 1962 | 0.14  | 9.36   | 0 |
| Preschool intervention with disadvantaged children in early 1960s Cambridge, responsive environments           | 1962 | 0.00  | 8.72   | 0 |
| The Perry Preschool                                                                                            | 1962 | 1.10  | 9.23   | 0 |
| Howard University Preschool Program                                                                            | 1964 | 0.47  | 20.41  | 0 |
| 6-month Full-Day Preschool for 3- to 4-year-olds with curriculum emphasis on language, social skills, & health | 1964 | 0.74  | 10.38  | 0 |
| Karnes Ameliorative Curriculum Pre-K                                                                           | 1965 | 1.60  | 1.35   | 0 |
| NY Pre-K for disadvantaged children                                                                            | 1965 | 0.08  | 100.00 | 0 |
| Preschool in Fremont, CA                                                                                       | 1966 | -0.19 | 7.29   | 0 |
| Urbana Infant Home Tutoring Program                                                                            | 1966 | 1.10  | 6.40   | 0 |
| Greensboro Demonstration Nursery Center                                                                        | 1967 | 0.81  | 7.29   | 0 |
| Project Know-How                                                                                               | 1967 | 0.65  | 13.16  | 0 |
| Yale Child Welfare Research Program                                                                            | 1968 | 1.22  | 7.88   | 0 |
| Home Oriented Preschool Education, TV & Home visit & Mobile classroom vs. control                              | 1968 | 0.15  | 2.88   | 0 |
| Home Oriented Preschool Education, TV & Home visit & Early childhood classroom vs. control, 1969               | 1968 | 0.38  | 6.20   | 0 |
| Home Oriented Preschool Education, TV & Home visit & Early childhood classroom vs. control, 1970               | 1968 | 0.67  | 5.53   | 0 |
| Syracuse University Family Development & Research                                                              | 1969 | 0.46  | 100.00 | 0 |
| Abecedarian Project                                                                                            | 1972 | 0.90  | 16.47  | 0 |
| Pittsfield, MA Parent-Child Home Program, 1978                                                                 | 1974 | 0.36  | 16.41  | 0 |
| Pittsfield, MA Parent-Child Home Program, 1983                                                                 | 1974 | 0.86  | 8.35   | 0 |
| Infants in community-based day care                                                                            | 1976 | 0.39  | 1.34   | 0 |
| Project CARE                                                                                                   | 1978 | 0.44  | 4.27   | 0 |
| Field Teacher Mother Parent Training                                                                           | 1979 | 0.62  | 17.29  | 0 |
| BYU Pre-school program effects on Low-Risk Children                                                            | 1980 | 0.48  | 18.09  | 0 |
| Child care from infancy to 3 years of age                                                                      | 1981 | 0.01  | 5.71   | 0 |
| Children of Poverty: A multi-level analysis of the determinants of intellectual development                    | 1983 | 0.74  | 29.98  | 0 |
| Infant Health and Development Program                                                                          | 1984 | 0.26  | 76.74  | 0 |
| Chicago Parent Center                                                                                          | 1985 | 0.17  | 93.85  | 0 |
| Even Start National Evaluation                                                                                 | 1991 | 0.04  | 27.13  | 0 |
| North Carolina Pre-K Evaluation, Chapter 1 preschool                                                           | 1991 | 0.10  | 47.52  | 0 |
| North Carolina Pre-K Evaluation, Family-focused preschool                                                      | 1991 | 0.13  | 18.29  | 0 |
| North Carolina Pre-K Evaluation, Community daycare                                                             | 1991 | 0.49  | 20.06  | 0 |
| Comprehensive Child Development Program                                                                        | 1991 | 0.03  | 100.00 | 0 |
| The NICHD Study of Early Child Care and Youth Development                                                      | 1991 | 0.20  | 100.00 | 0 |
| Kentucky Educational Reform Act (KERA) Preschool Program, cohort 1                                             | 1992 | 0.22  | 79.58  | 0 |
| Kentucky Educational Reform Act (KERA) Preschool Program, cohort 3                                             | 1992 | 0.11  | 63.45  | 0 |

|                                                           |      |       |        |   |
|-----------------------------------------------------------|------|-------|--------|---|
| Georgia Pre-K Program                                     | 1993 | 0.23  | 53.98  | 0 |
| Michigan School Readiness Program Longitudinal Evaluation | 1995 | 0.25  | 52.17  | 0 |
| Charlotte Bright Beginnings Pre-K Evaluation              | 1997 | 0.29  | 100.00 | 0 |
| Center-based language intervention program                | 1997 | 1.09  | 2.99   | 0 |
| Parent-child intervention for depressed mothers           | 1997 | 0.43  | 20.57  | 0 |
| Literature-Math-Scaffolding Intervention                  | 1998 | 0.26  | 14.83  | 0 |
| Third Even Start evaluation                               | 1999 | -0.19 | 38.91  | 0 |
| Utah Pre-K Kindergarten Readiness Program                 | 2003 | 0.16  | 43.92  | 0 |
| Five State Pre-K RD Evaluation, Michigan                  | 2004 | 0.13  | 100.00 | 0 |
| Five State Pre-K RD Evaluation, New Jersey                | 2004 | 0.09  | 100.00 | 0 |
| Five State Pre-K RD Evaluation, Kolahoma                  | 2004 | 0.14  | 100.00 | 0 |
| Five State Pre-K RD Evaluation, South Carolina            | 2004 | 0.14  | 100.00 | 0 |
| Five State Pre-K RD Evaluation, West Virginia             | 2004 | 0.15  | 100.00 | 0 |

**Appendix References** (\* indicates that the study contributed data to Figure 2)

- \*Abbott-Shim, M., Lambert, R. and McCarty, F. (2003). A comparison of school readiness outcomes for children randomly assigned to a Head Start program and the program's wait list. *Journal of Education for Students Placed at Risk*. 8(2): 191-214.
- \*Abelson, W.D. (1974). Head Start graduates in school: Studies in New Haven, Connecticut. Ryan, S. (Ed.), *A Report on Longitudinal Evaluations of Preschool Programs*. Volume 1, 1-14. Washington, DC: Office of Child Development, US Department of Health, Education and Welfare.
- \*Ackerman Ross, F. S. (1985). The relationship of day care to middle-class three-year-olds' language performance (maternal employment, cognitive). Unpublished Ph.D., Memphis State University, United States -- Tennessee.
- \*Administration for Children and Families (2002). Making a Difference in the Lives of Infants and Toddlers and Their Families: The Impacts of Early Head Start. Washington, DC: U.S. Department of Health and Human Services, 2002.
- \*Administration on Children, Youth and Families (2001). Building their futures: How Early Head Start programs are enhancing the lives of infants and toddlers in low-income families. Washington, DC: Department of Health and Human Services, 2001.
- \*Allerhand, M. (1965). Impact of summer 1965 Head Start on children's concept attainment during kindergarten. (ED 015 733)
- \*Ametjian, A. (1965). The effects of a preschool program upon the intellectual development and social competency of lower class children. Doctoral dissertation, Stanford University, Palo Alto, CA.



- \*Barnett, W. S., Jung, K., Lamy, C., Wong, V., & Cook, T. (2007). Effects of five-state prekindergarten programs on early learning. Paper presented at the SRCD annual meeting, Boston, MA.
- \*Beach, D. W. (2004). The effects of a school district's kindergarten readiness summer program on phonological awareness skills of at-risk prekindergarten students: A regression discontinuity analysis. Unpublished Ph.D., Utah State University, United States -- Utah.
- \*Bennett, T. L. (2000). Teachers' use of children's literature, mathematics manipulatives, and scaffolding to improve preschool mathematics achievement: Does it work? United States -- Texas, University of North Texas.
- \*Bertram, C. L., Hines, B.W., & MacDonald, R. (1971). Summative Evaluation of the Home-Oriented Preschool Education Program: Summary Report. Division of Research and Evaluation, Appalachia Educational Laboratory.
- \*Bissell, J. S. (1973). Bissell Planned variation in Head Start and Follow Through J.S. Stanley (Ed.), *Compensatory education for children ages two to eight*, Johns Hopkins University Press, Baltimore (1973), pp. 63–107
- \*Blatt, B. & Garfunkel, F. (1969). *The educability of intelligence: Preschool intervention with disadvantaged children*. Washington, DC: The Council for Exceptional Children Inc.
- Borenstein M., Hedges, L., Higgins, J., & Rothstein, H. (2005). *Comprehensive Meta-analysis*, Version 2. Englewood N. J.: Biostat.
- \*Bryant, D. M., Peisnar-Feinberg, E. S., and Clifford, R. M. (1993). Evaluation of Public Preschool Programs in North Carolina, University of North Carolina (Chapel Hill, N.C.: 1993)

- \*Bridge, C. A., Townley, K. F., Hemmeter, M. L. & de Mesquita, P. B. (1993). Third party evaluation. Kentucky Education Reform Act (KERA) preschool programs. Lexington: University of Kentucky, College of Education and College of Human Environmental Sciences.
- \*Bridge, C. A., Townley, K. F., Hemmeter, M. L. & de Mesquita, P. B. (1995). Third party evaluation of the Kentucky Education Reform Act preschool programs. Frankfort, KY: Kentucky Department of Education. (ED 394 628)
- \*Brooks-Gunn, J., Liaw, F., & Klebanov, P. (1992). Effects of early intervention on low birth weight preterm infants: What aspects of cognitive functioning are enhanced? *Journal of Pediatrics*, 120(3), 350-359.
- \*Brooks-Gunn, J., McCarton, C. M., Casey, P. H., et al. (1994). Early intervention in low-birth-weight premature infants: Results through age 5 years from the infant health and development program. *Journal of the American Medical Association*, 272(16), 1257-1262.
- Camilli, G., Vargas, S., Ryan, S., & Barnett, W. S. (2010). Meta-analysis of the effects of early education interventions on cognitive and social development. *Teachers College Record*, 112(3).
- \*Chesterfield, R. et al (1982). An Evaluation of the Head Start Bilingual Bicultural Curriculum Development Project. Final Report. (ERIC Document Reproduction Service No. ED 212 391)
- \*Cicarelli, V. G., Cooper, W. H. & Granger, R. L. (1969). The impact of Head Start: An evaluation of the effects of Head Start on children's cognitive and affective development.

Volume 2. Office of Economic Opportunity. Athens, OH: Westinghouse Learning Corporation and Ohio University. PB 184 329.

- \*Cline, M. G. & Dickey, M. (1968). An evaluation and follow-up study of summer 1966 Head Start children in Washington, DC. Washington, DC: Howard University. (ED 020 794)
- \*Di Lorenzo, L. T., Salter, R. & Brady, J. J. (1969). Prekindergarten programs for educationally disadvantaged children. Final report. New York: New York State Department of Education. (ED 038 460)
- \*Dunham, R., Kidwell, J., & Portes, P. (1988). Effects of parent-adolescent interaction on the continuity of cognitive development from early childhood to early adolescence. *Journal of Early Adolescence*, 8(3), 297-310.
- \*Erickson, E. L., McMillan, J., Bonnell, J., Hofman, L. & Callahan, O.D. (1969). Experiments in Head Start and early education: The effects of teacher attitude and curriculum structure on preschool disadvantaged children. Final report. 186. Office of Economic Opportunity, Washington, DC. Washington, DC. Western Michigan University, Kalamazoo. Center for Sociological Research. OEO-4130. (ED 041 615)
- \*Esteban, M. (1987). A comparison of Head Start and non-Head Start reading readiness scores of low-income kindergarten children of Guam. *Dissertation Abstracts International*, 49, 0723. (UMI No. 8808677)
- \*Field, T., Pickens, J., et al. (2000). "Targeting adolescent mothers with depressive symptoms for early intervention." *Adolescence* 35(138): 381-414.
- \*Field, T., Widmayer, S., Greenberg, R., & Stoller, S. (1982). Effects of parent training on teenage mothers and their infants. *Pediatrics*, 6, 703-707.

- \*Gray, S. W., & Klaus, R. A. (1970). The early training project: A seventh-year report. *Child Development*, 41, 909–924.
- \*Henderson, R. W., Rankin, R. J. & Frosbisher, M. W. (1969). Positive effects of a bicultural preschool program on the intellectual performance of Mexican-American children. Paper presented at the annual meeting of the American Educational Research Association, Los Angeles: Tucson: Arizona University, College of Education.
- \*Herzog, E., Newcomb, C. H. & Cisin, I. H. (1973). Preschool and postscript: An evaluation of the inner-city program. Washington, DC: Social Research Group, Washington University. (ERIC Document Reproduction Service ED 118241)
- \*Hines, B. W. (1971). Analysis of Visual Perception of Children in the Appalachia Preschool Education Program. Division of Research and Evaluation, Appalachia Educational Laboratory.
- \*Hines, B. W. (1971). Attainment of Cognitive Objectives. Division of Research and Evaluation, Appalachia Educational Laboratory.
- \*Hines, B. W. (1971). Detailed Analysis of Language Development of Preschool Children in ECE Program. Technical Report No. 4. Division of Research and Evaluation, Appalachia Educational Laboratory.
- \*Howard, J. L. and Plant, W. T. (1967). "Psychometric evaluation of an operant Head Start program." *Journal of Genetic Psychology* 111: 281-288.
- \*IHDP research team (1990). Enhancing the outcomes of low-birth-weight, premature infants: A multisite, randomized trial. *The Journal of the American Medical Association*, 263, 3035-3042.

- Jacob, R. T., Creps, C. L., & Boulay, B. (2004). *Meta-analysis of research and evaluation studies in early childhood education*. Cambridge, MA: Abt Associates Inc.
- \*Karnes, M. B., Hodgins, A. S., & Teska, J. A. (1969). The effects of early education with disadvantaged infants. In *Investigations of classroom and at-home interventions: Research and development programs on preschool disadvantaged children*.
- \*Karnes, M. B., Hodgins, A. S., Stoneburner, R. L., Studley, W. M. & Teska, J. A. (1968). "Effects of a highly structured program of language development on intellectual functioning and psycholinguistic development of culturally disadvantaged three-year-olds." *The Journal of Special Education* 2(4): 405-412.
- \*Keister, M., (1978). A demonstration project: Group care for infants and toddlers. Final Report, University of North Carolina at Greensboro.
- \*Klebanov, P. K., Brooks-Gunn, J., & McCormick, M. C. (2001). Maternal coping strategies and emotional distress: results of an early intervention program for low birth weight young children. *Developmental Psychology*, 37(5), 654-667.
- \*Krider, M. A. & Petsche, M. (1967). An evaluation of Head Start pre-school enrichment programs as they affect the intellectual ability, the social adjustment, and the achievement level of five-year-old children enrolled in Lincoln, Nebraska. Lincoln, NE: University of Nebraska. (ERIC Document Reproduction Service No. ED 015 011)
- \*Lally, J. R. & Honig, A. S. (1977). The Family Development Research Program: A program for prenatal, infant & early childhood enrichment. Final Report. Syracuse, NY: Syracuse University. (ED 143 458)
- \*Larsen, J. M. (1985). Family influences on competence in low-risk preschool children. Toronto, Canada: Society for Research in Child Development.

- \*Larson, D. F. (1969). The effects of a preschool experience upon intellectual functioning among four-year-old, white children in rural Minnesota. Mankato: Minnesota State University, College of Education. (ED 039 030)
- Layzer, J. I., Goodson, B. D., Bernstein, L., & Price, C. (2001). *National evaluation of family support programs, volume A: The meta-analysis, final report*. Cambridge, MA: Abt Associates Inc.
- \*Lee, M., & Burchinal, M. (1987). *Children of Poverty: A Multi-Level Analysis of the Determinants of Intellectual Development*.
- \*Lee, V. E., Schnur, E. & Brooks-Gunn, J. (1988). Does Head Start work? A 1-year follow-up comparison of disadvantaged children attending Head Start, no preschool, and other preschool programs. *Developmental Psychology* 24(2): 210-222.
- \*MacDonald, R. (1971). *Analysis of Intelligence Scores*. Division of Research and Evaluation, Appalachia Educational Laboratory.
- \*McNamara, J.R. (1968). *Evaluation of the effects of Head Start experience in the area of self-concept, social skills, and language skills*. Pre-publication draft. Miami, FL: Dade County Board of Public Instruction. (ED 028 832)
- \*Morris, B. & Morris, G.L. (1966). *Evaluation of changes occurring in children who participated in project Head Start*. Kearney, NE: Kearney State College. (ED 017 316)
- \*NICHD Early Child Care Research Network & Duncan, G. J. (2003). Modeling the impacts of child care quality on children's preschool cognitive development. *Child Development*, 74, 1454–1475.
- \*Nummedal, S. G. & Stern, C. (1971). *Head Start graduates: One year later*. Paper presented at the annual meeting of the American Educational Research Association, New York, NY.

- \*Pilcher, L. C. (1994). Georgia Prekindergarten Program Evaluation with Executive Summary. Atlanta, GA: Georgia State University Early Childhood Education.
- \*Porter, P. J., Leodas, C., Godley, R. A. & Budroff, M. (1965). Evaluation of Head Start educational program in Cambridge, Massachusetts. Final Report. Cambridge, MA: Harvard University. (ED 013 668)
- \*Ramey, C. T., & Campbell, F. A. (1984). Preventive education for high-risk children: Cognitive consequences of the Carolina Abecedarian Project. *American Journal of Mental Deficiency*, 88, 515–523.
- \*Rescorla, L. A., Provence, S., & Naylor, A. (1982). The Yale Child Welfare Research Program: Description and results. In E. F. Zigler & E. Gordon (Eds.), *Day care: Scientific and social policy issues* (pp. 183–199). Boston: Auburn House.
- \*Reynolds, A. J. (1995). One year of preschool intervention or two: Does it matter? *Early Childhood Research Quarterly*, 10, 1–31.
- \*Roberts, J. E., Rabinowitch, S., Bryant, D. M., Burchinal, M. R., Koch, M. A. & Ramey, C. T. (1989). Language skills of children with different preschool experiences. *Journal of Speech, Language, and Hearing Research* 32(4): 773-786.
- \*Robertson, S. B. & S. E. Weismer (1999). Effects of treatment on linguistic and social skills in toddlers with delayed language development. *Journal of Speech, Language, and Hearing Research* 42(5): 1234-1248.
- \*Rubenstein, J. L.. (1981). A Two-Year Follow-Up of Infants in Community-Based Day Care. *Journal of Child Psychology and Psychiatry and Allied Disciplines*, 22(3), 209.

- \*Smith, E. J., Pellin, B. J., Agruso, S. A., & Educational Research Service, A. V. A. (2003).  
Bright Beginnings: An Effective Literacy-Focused PreK Program for Educationally  
Disadvantaged Four-Year-Old Children (No. 1-931762-15-5).
- \*Sontag, M., Sella, A. P. & Thorndike, R. L. (1969). The effect of Head Start training on the  
cognitive growth of disadvantaged children. *The Journal of Educational Research* 62(9):  
387-389.
- \*St. Pierre, R., Swartz, J., Gamse, B., Murray, S., Deck., D. & Nickel, P. (1993) National  
Evaluation of the Even Start Family Literacy Program, Final report. Washington, DC: US  
Department of Education.
- \*St. Pierre, R. G., Layzer, J. I., Goodson, B. D., Bernstein, L. S. (1997). National Impact  
Evaluation of the Comprehensive Child Development Program. Cambridge, MA: Abt  
Associates, Inc.
- \*St. Pierre, R. G., Ricciuti, A. E., & Rimdzius, T. A. (2005). Effects of a Family Literacy  
Program on Low-Literate Children and Their Parents: Findings From an Evaluation of  
the Even Start Family Literacy Program. *Developmental Psychology*, 41(6), 953-970.
- \*Ricciuti, A. E, St. Pierre., R. P., Lee, W., Parsad, A., Institute of Education Sciences, W. D. C.,  
& Abt Associates, (2004). Third National Even Start Evaluation: Follow-Up Findings  
from the Experimental Design Study. NCEE 2005-3002: National Center for Education  
Evaluation and Regional Assistance NCEE.
- \*Tamminen, A. W., Weatherman, R. F. & McKain, C. W. (1967). An evaluation of a preschool  
training program for culturally deprived children. Final report. U.S. Department of  
Health, Education, and Welfare. Duluth: University of Minnesota. BR-5-8156. (ED 019  
135)



- \*U.S. Department of Health and Human Services, Administration for Children and Families (2005), Head Start Impact Study: First Year Findings, Washington, DC.
- \*Vance, B. J. (1967). The effect of preschool group experience on various language and social skills in disadvantaged children. Final report. (ED 019 989)
- \*Vele, E. M. (2004). Relationship-based, dyadic Early Head Start intervention. Unpublished Ph.D., Yeshiva University, United States -- New York.
- \*Weikart, D. P., Bond, J. T. & McNeil, J. T. (1978). The Ypsilanti Perry Pre-School Project: Pre-school years and longitudinal results through fourth grade. Monographs of the High/Scope Educational Research Foundation 3. Ypsilanti, MI: High/Scope Educational Research Foundation.
- \*Xiang, Z. & Schweinhart, L. J. (2002). Effects five years later: The Michigan School Readiness Program evaluation through age 10. Michigan State Board of Education. Ypsilanti, MI: High/Scope Educational Research Foundation.
- \*Young-Joo, K. (2007). The return to private school and education-related policy. University of Wisconsin (dissertation).
- \*Zigler, E. F., Ableson, Trickett & Seitz (1982). Is an intervention program necessary in order to improve economically disadvantaged children's IQ scores? *Child Development* 53(2): 340-348.
